# Supplementary material for: Viral entry and translation in brain endothelia provoke influenza-associated encephalopathy
Source: Springer Nature journal article supplement (doi:10.1007/s00401-024-02723-z), 2024-04-30
Supplement: MOESM1 [file 27039464]

## **Supplementary Information**

### **Viral entry in brain endothelia and viral translation provoke influenza-associated encephalopathy**

Shihoko Kimura-Ohba, Mieko Kitamura, Yusuke Tsukamoto, Shigetoyo Kogaki, Shinsuke Sakai, Hiroaki Fushimi, Keiko Matsuoka, Makoto Takeuchi, Kyoko Itoh, Keiji Ueda, Tomonori Kimura

## **Supplementary Methods**

### **Antibodies**

Anti-mouse CD31 (CD31; 1:50, Dianova), influenza A virus nucleoprotein antibody (fluA-NP; 1:1600, Gene Tex), anti-CD31 antibody [C31.3+JC/70A] (CD31; 1:100, Abcam), anti-Iba-1 (1:3000, Wako), MLKL polyclonal antibody (MLKL; 1:100, Proteintech), phospho- mixed lineage kinase domain-like protein antibody (p-MLKL; 1:50, Invitrogen), anti-caspase-8 antibody (1:50, Abcam), anti-gial fibrillary acidic protein antibody (GFAP; 1:1000, Abcam), anti-GFAP [Clone G-A-5] (GFAP;1:500, Sigma-Aldrich), aquaporin-4 antibody (AQP4; 1:5000, Thermo Fisher Scientific), and goat anti mouse IgG H&L (Alexa Fluor®594) (1:500, Abcam).

### **Viral quantitative analysis with animal brain tissue and infected cells**

The supernatant of either cells or brain tissue in 10-folds dilution series was applied to MDCK cells seeded in 6-well plates at approximately 95% confluency, 6-well plates were then incubated for 1 h at 37°C with rocking every 15 min. The inoculum was removed, and the cells were washed twice with PBS. MDCK cells were then covered with overlay media (serum-free MEM containing 2 mmol/l L-glutamine with 0.75% Agarose ME (Iwai Chemicals Company Ltd.)) and incubated at 37°C for 72 h. MDCK cells were fixed and stained with 1% crystal violet to count the number of plaques. Infectious titers of the supernatant were defined according to the number of plaque-forming units (pfu)/ml, the dilution ratio of the supernatant, and the tissue weights (fluid volume (ml) for the whole blood).

## Supplementary Table.1

|                                  | Case1              | Case2           | Case3              |
|----------------------------------|--------------------|-----------------|--------------------|
| Age                              | 13y                | 5y              | 1y                 |
| Died at                          | 2004               | 1998            | 1998               |
| Diagnosis of IAE                 | HSES               | Reye's syndrome | Reye's syndrome    |
| Co-morbidities                   | Tuberous sclerosis | Not reported    | CHARGE association |
| Viral protein detection in brain | Yes                | Yes             | Yes                |
| Viral protein colocalized at EC  | Yes                | Yes             | Yes                |

## Supplementary Figures

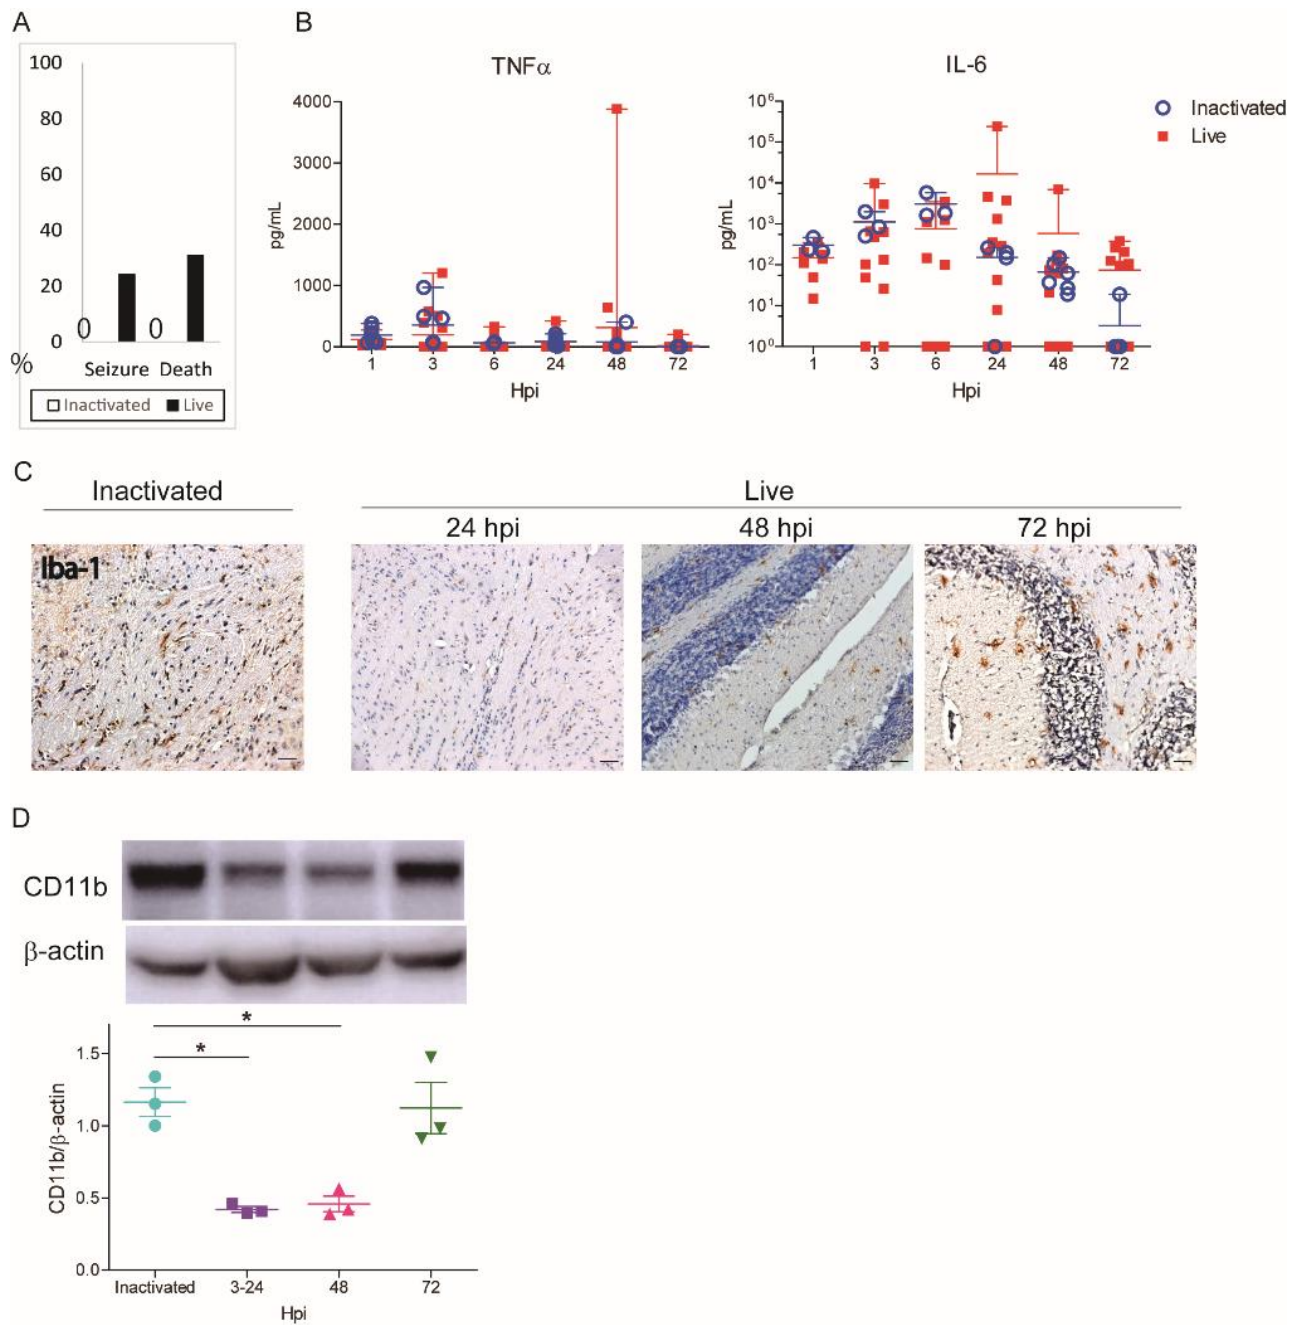

**Supplementary Figure 1. The IVE mouse model mimicked the characteristics of the patients with IAE.**

(A) Seizure and death rates of IVE mice. (B) Cytokine levels (left,  $\text{TNF}\alpha$ ; right, IL-6) of IVE mice serum harvested at the indicated hpi. (C) Representative images of the brains of IVE mice harvested at the indicated hpi stained with Iba-1 (a marker of microglia). (D) Quantification of CD11b (a marker of microglia) by western blot from the brains of IVE mice at the indicated hpi.  $n = 3$

Scale bars indicate (C) 50  $\mu\text{m}$ . Data are presented as means  $\pm$  SE, \* $p < 0.05$ .

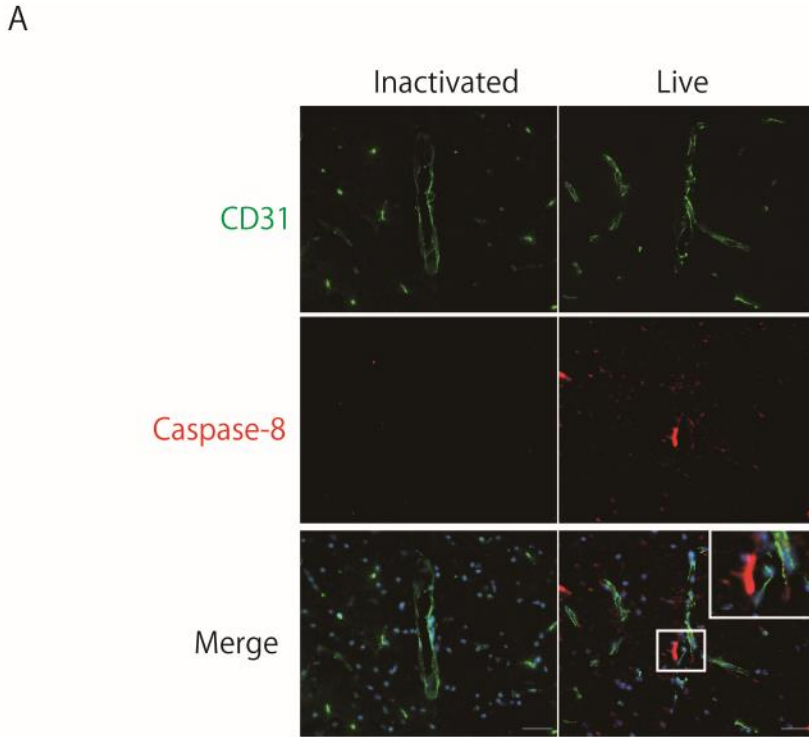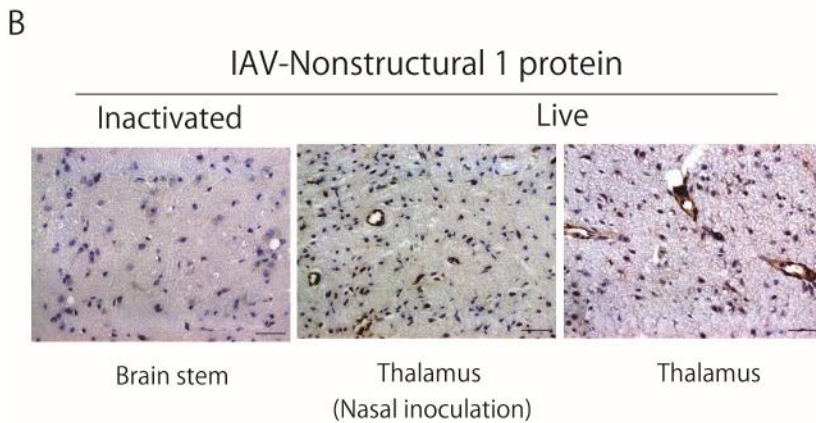

**Supplementary Figure 2. Histological analysis of mouse brains infected with IAV.**

(A) Images of the brains of IVE mice at 72 hpi stained with anti-caspase-8 antibody. Red, Caspase-8 (a marker of apoptosis); green, CD31; blue, DAPI;  $n = 3$ . (B) Representative images of brains from mice with inactivated (left panel) and live (middle and right panels) IAV intranasal inoculation, harvested at 120 hpi and stained with IAV-nonstructural 1 (NS-1) protein.

Scale bars indicate 50  $\mu\text{m}$ ,

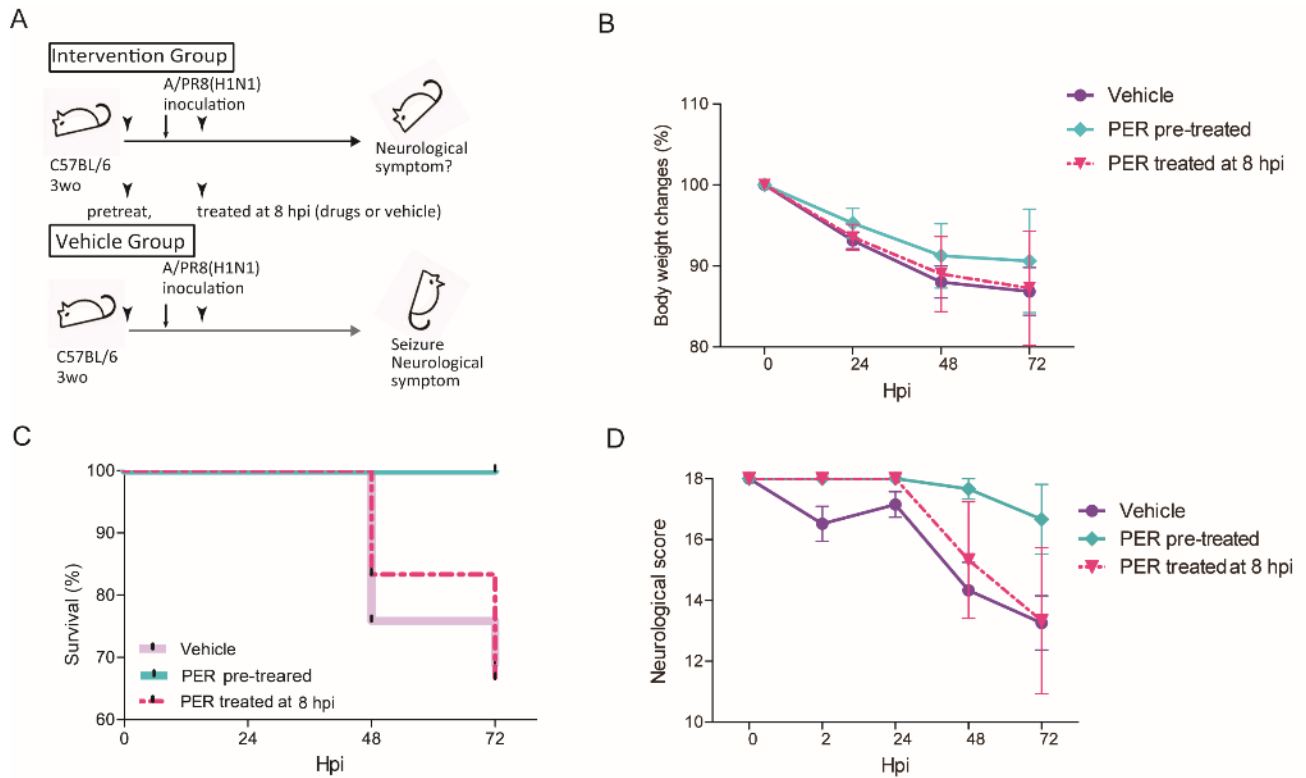

**Supplementary Figure 3. Improved lethality of the IVE mice by a neuraminidase inhibitor.**

(A) Schematic diagram of the experimental schedule. IVE mice were treated with PER, either before (pre-treatment) or 8 h after inoculation (post-treatment). (B) Change in body weight, (C) Kaplan-Meier analysis of survival rate, and (D) neurological scores of IVE mice.  $n = 6-11$ .
